# Supplementary material
Source: PubMed Central journal article supplement (PMC153604)
Supplement: pnas_0732813100_6.pdf [file pnas_0732813100_6.pdf]

**Table 3. G protein-coupled receptors (GPCRs) used for radioligand binding studies with CUR61414**

| No. | Receptor          | Subtypes                                                                                                                                                                                      | Species | No. | Receptor                            | Subtypes                                                                                                         | Species |
|-----|-------------------|-----------------------------------------------------------------------------------------------------------------------------------------------------------------------------------------------|---------|-----|-------------------------------------|------------------------------------------------------------------------------------------------------------------|---------|
| 1   | Adenosine         | A <sub>1</sub> -A <sub>2A</sub> -A <sub>2B</sub>                                                                                                                                              | H       | 16  | Melanocortin                        | MC4                                                                                                              | H       |
| 2   | Adrenergic        | <u>α<sub>1A</sub></u> - <u>α<sub>1B</sub></u> - <u>α<sub>1C</sub></u> - <u>α<sub>2A</sub></u> - <u>α<sub>2B</sub></u> - <u>α<sub>2C</sub></u> -β <sub>1</sub> -β <sub>2</sub> -β <sub>3</sub> | H R     | 17  | Melatonin                           | ML <sub>1</sub>                                                                                                  | Ch      |
| 3   | Angiotensin       | AT <sub>1</sub> -AT <sub>2</sub>                                                                                                                                                              | H       | 18  | Muscarinic                          | M <sub>1</sub> -M <sub>2</sub> -M <sub>3</sub> -M <sub>4</sub> -M <sub>5</sub>                                   | H       |
| 4   | Bombesin          |                                                                                                                                                                                               | R       | 19  | Neuropeptide                        | Y <sub>1</sub> -Y <sub>2</sub>                                                                                   | H       |
| 5   | Bradykinin        | B <sub>2</sub>                                                                                                                                                                                | H       | 20  | Neurotensin                         |                                                                                                                  | M       |
| 6   | Calcitonin        |                                                                                                                                                                                               | H       | 21  | Opiate                              | δ-κ-μ                                                                                                            | H       |
| 7   | Canabinoid        | CB <sub>1</sub> -CB <sub>2</sub>                                                                                                                                                              | H       | 22  | Platelet Activating Factor (PAF)    |                                                                                                                  | Rb      |
| 8   | Chemokine         | CCR5-CXCR1-CXCR2                                                                                                                                                                              | H       | 23  | Purinergic                          | <u>P<sub>2U</sub></u> - <u>P<sub>2Y</sub></u>                                                                    | Rb R    |
| 9   | Cholecystokinin   | CCK <sub>A</sub> -CCK <sub>B</sub>                                                                                                                                                            | H       | 24  | Serotonin 5-HT                      | HT <sub>1A</sub> -HT <sub>1B</sub> -HT <sub>1D</sub> - <u>HT<sub>2</sub></u> -HT <sub>2A</sub> -HT <sub>2B</sub> | H R     |
| 10  | Dopamine          | D <sub>1</sub> -D <sub>2L</sub> -D <sub>2</sub> -D <sub>4L</sub> -D <sub>5</sub>                                                                                                              | H       |     |                                     | HT <sub>3C</sub> -HT <sub>3</sub> - <u>HT<sub>4</sub></u> -HT <sub>5A</sub> -HT <sub>6</sub> -HT <sub>7</sub>    | H GP    |
| 11  | Endothelin        | ET <sub>A</sub> -ET <sub>B</sub>                                                                                                                                                              | H       | 25  | Tachykinin                          | NK <sub>1</sub> -NK <sub>2</sub> -NK <sub>3</sub>                                                                | H       |
| 12  | GABA <sub>A</sub> | Agonist Site                                                                                                                                                                                  | R       | 26  | Thromboxane                         | A <sub>2</sub> (TXA <sub>2</sub> )                                                                               | Rb      |
| 13  | Galanin           |                                                                                                                                                                                               | H       | 27  | Thyrotropin Releasing Hormone (TRH) |                                                                                                                  | R       |
| 14  | Histamine         | <u>H<sub>1</sub></u> - <u>H<sub>2</sub></u> - <u>H<sub>3</sub></u>                                                                                                                            | R GP    | 28  | Vasoactive Intestinal Peptide (VIP) | VIP <sub>1</sub>                                                                                                 | H       |
| 15  | Leukotriene       | B <sub>1</sub>                                                                                                                                                                                | H       | 29  | Vasopressin                         | V <sub>1A</sub>                                                                                                  | H       |

CUR61414 (3 μM) was incubated with the different GPCRs to determine the effect on binding of the natural ligands. H, human; Rb, rabbit; R, rat; M, mouse; Ch, chicken. Non-human subtypes are underlined. All IC<sub>50</sub>s were between ≤30% stimulation and ≤30% inhibition, and therefore not considered significant.
