# Supplementary material
Source: PubMed Central journal article supplement (PMC153604)

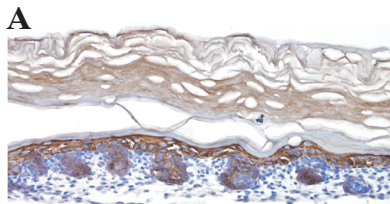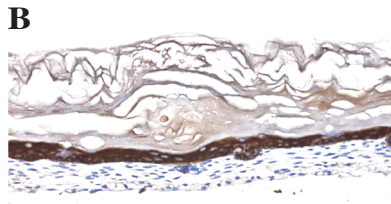

$\alpha$ -CK14

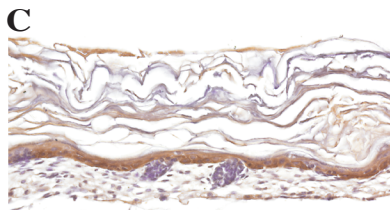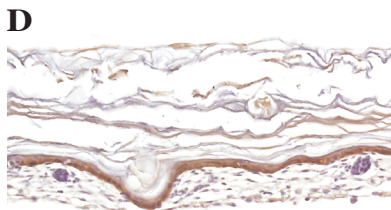

$\alpha$ -CK10

**Vehicle**

**CUR61414**

Supplement: pnas_0732813100_12.pdf [file pnas_0732813100_12.pdf]

# Specificity of Hedgehog Inhibitors

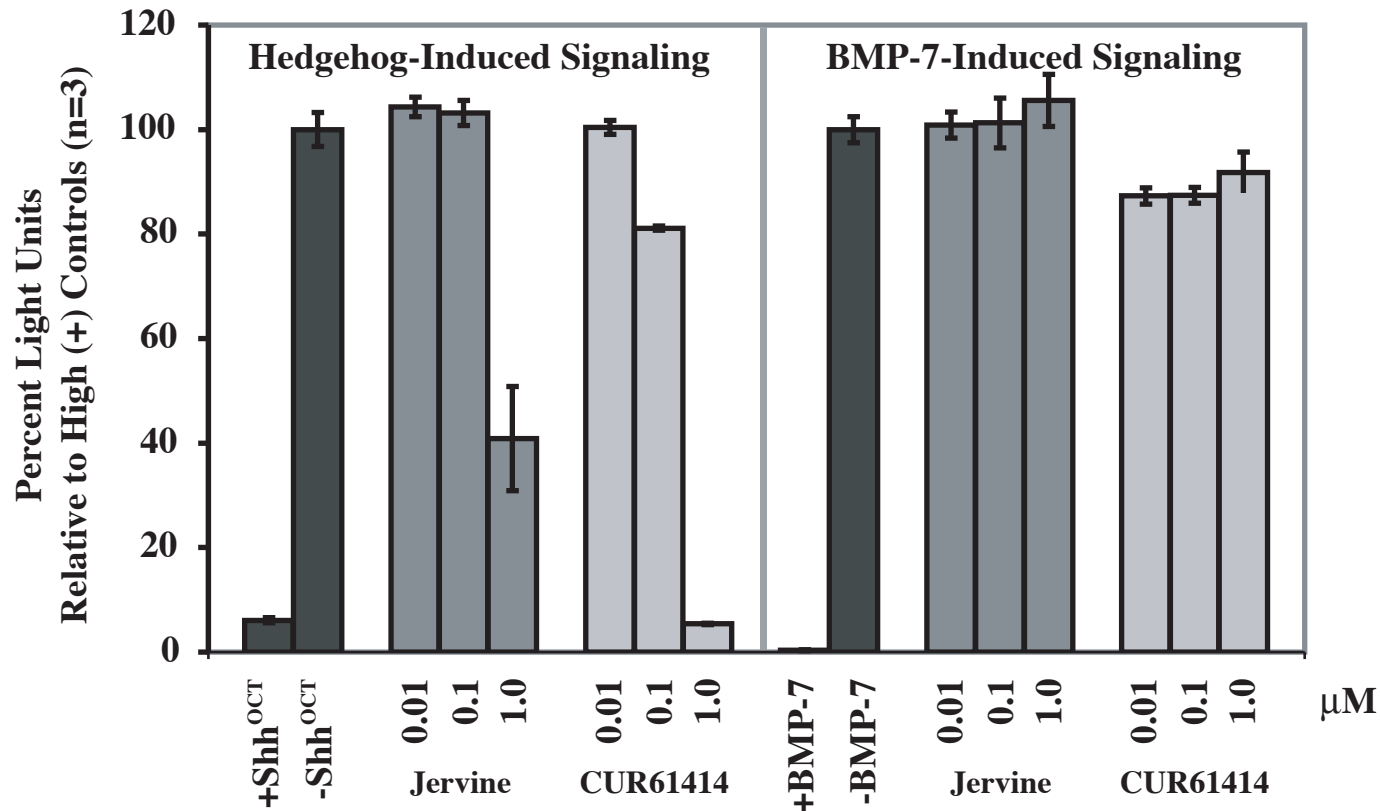

Supplement: pnas_0732813100_3.pdf [file pnas_0732813100_3.pdf]

|                       |   |   |     |     |       |
|-----------------------|---|---|-----|-----|-------|
| <b>Wnt3A:</b>         | - | + | +   | +   | +     |
| <b>CUR61414 (nM):</b> | 0 | 0 | 100 | 300 | 1,000 |

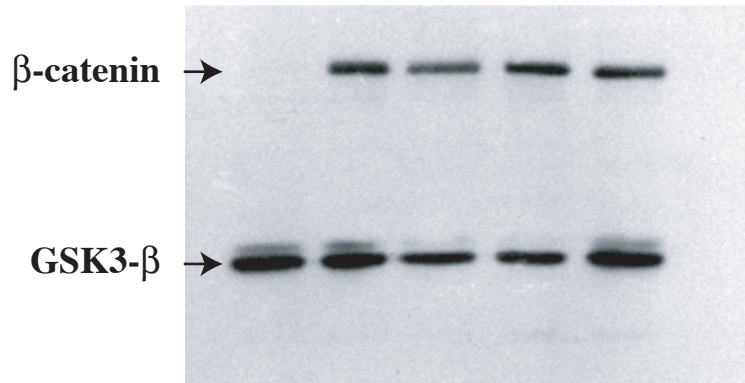

Supplement: pnas_0732813100_5.pdf [file pnas_0732813100_5.pdf]

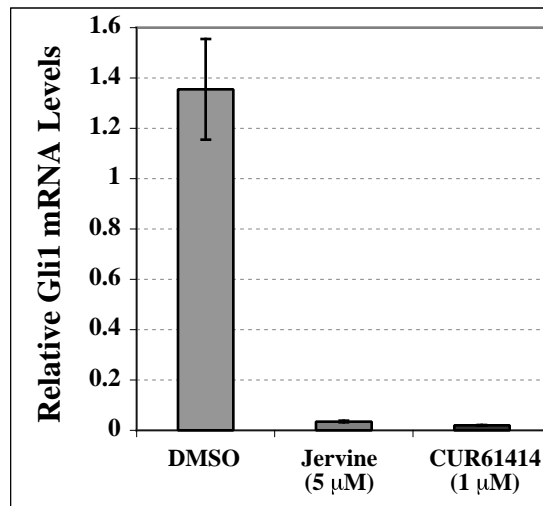

Supplement: pnas_0732813100_8.pdf [file pnas_0732813100_8.pdf]
